## Original article

# The anti-carbamylated protein antibody response is of overall low avidity despite extensive isotype switching

Myrthe A. M. van Delft<sup>1</sup>, Marije K. Verheul<sup>1</sup>, Leonie E. Burgers<sup>1</sup>, Solbritt Rantapää-Dahlqvist<sup>2</sup>, Annette H. M. van der Helm-van Mil<sup>1</sup>, Tom W. J. Huizinga<sup>1</sup>, René E. M. Toes<sup>1</sup> and Leendert A. Trouw<sup>1,3</sup>

## Abstract

**Objective.** To better understand the contribution of autoantibodies in RA and the biology of their responses, we evaluated the avidity of the anti-carbamylated protein (anti-CarP) antibody response.

**Methods.** The avidity of anti-CarP antibody, ACPA and anti-tetanus toxoid IgG were determined using elution assays. Anti-CarP IgG avidity was measured in sera of 107 RA patients, 15 paired SF and serum samples and 8 serially sampled sera before and after disease onset.

**Results.** The avidity of anti-CarP IgG is low compared with the avidity of anti-tetanus toxoid IgG present in the same sera. Likewise, although less pronounced, anti-CarP also displayed a lower avidity as compared with the avidity of ACPA IgG. No difference in anti-CarP IgG avidity is observed between ACPA positive or ACPA negative patients. Anti-CarP IgG avidity is higher in anti-CarP IgM-negative compared with IgM-positive individuals. Furthermore, the anti-CarP avidity in serum is higher than in SF. Using samples of individuals that over time developed RA we observed no anti-CarP avidity maturation in the years before disease onset. In contrast to ACPA avidity, the anti-CarP avidity is not associated with severity of joint destruction.

**Conclusion.** The anti-CarP response is of overall low avidity, even lower than the ACPA IgG avidity, and does not show apparent avidity maturation before or around disease onset. Overall, isotype switch and avidity maturation seem to be uncoupled as isotype switch occurs without avidity maturation, pointing towards a commonality in the regulation of both autoantibody responses as opposed to the pathways governing recall responses.

**Key words:** autoantibodies, anti-CarP antibodies, rheumatoid arthritis, antibody avidity, antibody avidity maturation

### Rheumatology key messages

- The anti-carbamylated protein response has a low IgG avidity, also in synovial fluid.
- No clear anti-carbamylated protein avidity maturation despite isotype switching, these processes seem to be uncoupled.
- The lower anti-carbamylated protein antibody avidity than ACPA avidity indicates differential regulation of these responses.

## Introduction

RA is a chronic autoimmune disease mainly affecting synovial joints [1, 2]. Several autoantibodies have been identified in serum and SF of RA patients [3]. These may form

immune complexes in the joints, leading to the attraction of immune cells through, for example, complement activation [4, 5], which can contribute to chronic inflammation and bone destruction.

Well-known autoantibodies that are currently used in the clinic for the diagnosis of RA are RF and ACPA [2]. More recently, anti-carbamylated protein (anti-CarP) antibodies have been detected in RA [6]. These antibodies detect carbamylated proteins, which are post-translationally modified proteins wherein lysines are converted to homocitrullines by a chemical reaction with cyanate [7, 8].

Various studies have shown a higher prevalence of anti-CarP antibodies in RA patients compared with controls

<sup>1</sup>Department of Rheumatology, Leiden University Medical Center, Leiden, The Netherlands, <sup>2</sup>Department of Public Health and Clinical Medicine/Rheumatology, Umeå University, Umeå, Sweden and <sup>3</sup>Department of Immunohematology and Blood Transfusion, Leiden University Medical Center, Leiden, The Netherlands

Submitted 16 February 2018; revised version accepted 17 April 2018

Correspondence to: Leendert A. Trouw, Leiden University Medical Center, PO Box 9600, 2300 RC, Leiden, The Netherlands.  
E-mail: l.a.trouw@lumc.nl

[6, 9–14]. Several observations implicate a role for anti-CarP-directed immunity in the pathogenesis of RA as anti-CarP antibodies: are present years before disease onset with a gradual increase before disease onset [9, 15, 16], are associated with the development of RA in arthralgia patients [17] and associate with increased joint destruction in RA [6, 9, 10, 12, 18]. Sera of RA patients can be positive for both anti-CarP antibody IgG and IgM [19], which is of interest as switching towards IgG is typically associated with a large decline or disappearance of IgM responses in case of conventional T-cell-dependent antigen responses [20].

During a B cell response, somatic hypermutation, affinity maturation and isotype switching occurs in the germinal centre. For somatic hypermutation, activated B cells will enter the germinal centre and start to proliferate and undergo hypermutation upon receiving T cell help. Studies using model antigens have shown that various B cell clones will compete for the antigen on follicular dendritic cells. Antibody avidity is defined as the overall binding strength of polyclonal (multivalent) antibodies to its multivalent antigens. Those B cells expressing the surface immunoglobulin that will bind with higher avidity, will outcompete other B cells because they attract more signals necessary for B cell survival and proliferation. Due to this process, the avidity of the immune response increases over time and low avidity B cells will typically disappear from the circulation.

While substantial information is available on the avidity maturation of antibody responses against recall antigens [21–23], less information is present on avidity maturation of autoantibody responses. However, it is described that the avidity of autoantibodies (high, moderate and low) associates with different clinical outcomes in several diseases [24]. Interestingly, in celiac disease the avidity of autoantibodies targeting transglutaminase is reported to be much lower than the avidity of anti-*Escherichia coli* antibodies present in the same sera [25]. In addition, previous data of our group showed that the average avidity of ACPA is much lower than the avidity of antibodies to recall antigens, even when many isotypes are used and levels are high [26]. These data indicate that although these B cells underwent isotype switching, and apparently attract sufficient signals for survival and proliferation, no or little avidity maturation was taking place. In a ‘normal’ B cell response, somatic hypermutation, isotype switching and avidity maturation are expected to occur side by side. ACPA can be detected many years prior to disease onset [27, 28] and during these years there is (limited) avidity maturation for the ACPA response [29]. Interestingly, the patients with the lowest ACPA avidity experienced the most pronounced joint destruction [30]. A low avidity does not mean that these antibodies are non-pathogenic as low avidity antibodies have, for example, enhanced capacity to penetrate deeper into tissue [31] and an enhanced capacity to activate complement [30]. Citrullination and carbamylation are two rather similar post-translational modifications, and although antibodies against both modifications are often seen together in RA, they represent two different antibody families as

also ACPA or anti-CarP single-positive patients exist and cross-reactivity towards the two modifications is incomplete [3].

Based on these previous observations and our interest in understanding the biology of the anti-CarP antibody response, we have studied the avidity of the anti-CarP antibody response in detail using baseline serum samples of RA patients with long-term follow-up data in the Leiden Early Arthritis Clinic cohort [32] as well as samples from patients in the phase before diagnosis [9, 28, 33]. We show here that the anti-CarP antibody avidity is low, even lower than the ACPA avidity, and that anti-CarP antibody IgG- and IgM-positive patients have a lower anti-CarP IgG avidity compared with anti-CarP antibody IgG-positive and IgM-negative patients.

## Methods

### Patients and control sera

Sera of 107 RA patients (average age 55.8 years and 64.5% female) were analysed for the anti-CarP antibody IgG avidity. As control, the avidity of the recall antibody anti-tetanus toxoid (TT) IgG was analyzed in sera of 86 RA patients (average age 47.8 years and 59.3% female). Next to this 34 age and sex matched RA patients with healthy controls (HCs) (average age 45 years and 61.7% female) were analysed for the anti-TT IgG avidity as well. Anti-CarP antibody [6, 19] and ACPA status were already available [19, 34] and used in these analysis. Furthermore, radiographs taken at yearly intervals were available for almost all tested RA patients. Baseline sera of RA patients participating in the Early Arthritis Clinic cohort [32] were analysed. RA patients were included between 1993 and 2003 and inclusion required a symptom duration <2 years [32]. HC samples were acquired from persons living in the Leiden region as described before [6]. Informed consent was obtained for all individuals participating and all protocols were approved by the local ethic committee of the Leiden University Medical Center (P237-94).

Paired serum and SF samples of 29 RA patients were analysed for anti-CarP antibody IgG avidity. Samples were kindly provided by RA patients and informed consent was signed.

Sera of eight anti-CarP antibody IgG-positive RA patients, sampled before and after symptom onset, were analysed for anti-CarP antibody IgG avidity maturation. These individuals were participating in the Medical Biobank of Northern Sweden or the Mammography screening project [9, 28, 33]. Informed consent was obtained for all individuals when donating blood and all protocols were approved by the Regional Ethics Committee at the University Hospital of Umeå, Sweden. Samples were also collected from these individuals when they were diagnosed with RA later at the Early Arthritis Clinic.

### Measurement of anti-CarP antibody and anti-TT IgG avidity

To determine the avidity of anti-CarP antibody IgG, ACPA IgG and anti-TT IgG, elution ELISA assays were used

[26, 35]. For anti-CarP antibody the appropriate serum dilution was determined by performing a titration using the anti-CarP IgG ELISA [6]. For ACPA and anti-TT IgG, this was done as previously described [26]. The serum dilution at which the response was in the linear part of the curve with an absorbance value around 1.5 at 415 nm was selected as optimal. The minimal dilution we used in the avidity assay was 1:12.5.

Protein carbamylation and citrullination and verification of the modification were done as before [6, 19, 36, 37]. To determine the anti-CarP antibody and ACPA IgG avidity, in-house coated CCP2 (1 µg/ml) [19], citrullinated fetal calf serum (10 µg/ml) (Bodinco, Alkmaar, Netherlands), carbamylated fetal calf serum (10 µg/ml) (Ca-FCS, Bodinco, Alkmaar, Netherlands) or carbamylated alpha-1-antitrypsin (10 µg/ml) (Ca-A1AT, Lee biosolutions, Maryland Height, MO, USA) plates were used and incubated with the appropriate serum dilutions. After washing, the wells were incubated with increasing concentrations of chaotropic agent sodium thiocyanate (NaSCN; Sigma Aldrich, Zwijndrecht, Netherlands) of 0.25, 0.5, 1, 2, 3 and 5 M, for 15 min at room temperature. After washing the bound antibodies were detected using horseradish peroxidase-labelled rabbit anti human IgG (Dako P0214; Dako, Heverlee, Belgium). The amount of antibodies bound to the plate with and without elution by NaSCN were determined using a standard curve.

The percentage re-binding, defined as the ratio of the amount of remaining antibodies to an antigen at a certain molarity NaSCN to the amount of bound antibodies in the absence of NaSCN, was calculated [26, 38]. The relative avidity index (AI) is defined as the ratio of the amount of remaining antibodies to an antigen at 1 M NaSCN to the amount of bound antibodies in the absence of NaSCN, expressed as a percentage [26, 38].

The anti-TT IgG avidity was determined using an in-house ELISA as previously described [26, 35].

### Statistical analysis

Statistical analysis was performed using Statistical Package for the Social Sciences (SPSS) version 23 (IBM, Armonk, NY, USA). In order to determine differences in antibody avidity between anti-CarP antibody IgG and anti-TT IgG in RA patients, anti-TT IgG avidity in RA patients and HC or anti-CarP IgM/IgA-positive and -negative RA patients, Mann-Whitney U tests were carried out. In order to investigate whether there are correlations between anti-CarP levels and AI, between anti-CarP AI and ACPA AI and between anti-CarP AI in SF and serum, Spearman Rank tests were performed. To study whether the presence of more anti-CarP isotypes associates with antibody avidity, Kruskal-Wallis tests were performed. Wilcoxon signed rank tests were performed to investigate differences in paired samples.  $P < 0.05$  was considered statistically significant.

In 107 RA patients, divided in quartiles of 27 patients based on the AI of anti-CarP IgG, the association between anti-CarP antibody IgG avidity and radiographic progression, as assessed by the Sharp-van der Heijde Score [39],

was analysed as described previously [6, 19, 32, 40]. As repeated radiographs were taken at yearly intervals we have used a multivariate normal regression analysis for longitudinal data. Adjustments for treatment strategy, age and sex had been made.  $P < 0.05$  was considered statistically significant.

## Results

### The avidity of anti-CarP is low compared with the avidity of TT

Anti-CarP antibodies can be detected using several antigens in ELISA [6, 36]. Here we have analysed the avidity of anti-CarP antibodies based on Ca-FCS and Ca-A1AT detection. The anti-CarP IgG avidity was compared with the IgG avidity directed against the recall antigen TT. Using increasing concentrations of chaotropic salt in the elution assays we observed a low avidity for antibodies against carbamylated proteins and as expected a high avidity for antibodies directed against the recall antigen TT (Fig. 1A). Within the same patients, similar results were found using Ca-FCS or Ca-A1AT as an antigen (Fig. 1A). As there were no major differences in the avidity of anti-CarP antibodies as detected by Ca-A1AT or Ca-FCS, we decided to use Ca-FCS as the antigen to study the anti-CarP avidity in a larger cohort.

Analysing 107 RA patients positive for anti-CarP IgG antibodies revealed that the avidity of anti-CarP IgG antibodies is generally low (median AI 21.1%). In contrast, the IgG avidity against the recall antigen TT was considerably higher (median AI 99.6%) (Fig. 1B). We tested whether patients with higher levels of anti-CarP antibodies, as a sign of a more pronounced anti-CarP response, would also have a higher avidity. However, we observed no correlation between the levels and avidity of anti-CarP antibody IgG (Fig. 1C) and patients with a high level do also display a low avidity. We verified whether RA patients were actually capable of mounting a proper avidity response by comparing the anti-TT avidity of patients to the anti-TT avidity of HCs and observed no difference (data not shown).

To summarize, anti-CarP IgG antibodies present in sera of RA patients are of low avidity as compared with the avidity of anti-TT IgG, irrespective of anti-CarP levels.

### Lower anti-CarP IgG avidity in anti-CarP IgM-positive RA patients

The anti-CarP antibody response comprises several isotypes and a substantial proportion of the patients is double-positive for the anti-CarP antibody IgG and IgM [19]. This is interesting, as switching towards IgG is typically associated with disappearance of IgM responses and the appearance of high avidity IgG antibodies in case of T-cell-dependent antigen responses [20]. Therefore, we hypothesized that RA patients positive for anti-CarP antibody IgG and IgM have a more actively ongoing, immature anti-CarP antibody response. In such a scenario, the anti-CarP IgG antibody avidity is conceivably lower in the anti-CarP IgM-positive group compared with the anti-CarP IgM-negative group. To test this hypothesis, the RA patients analysed were subdivided in

**Fig. 1** The anti-CarP IgG avidity is low and lower in anti-CarP IgM-positive RA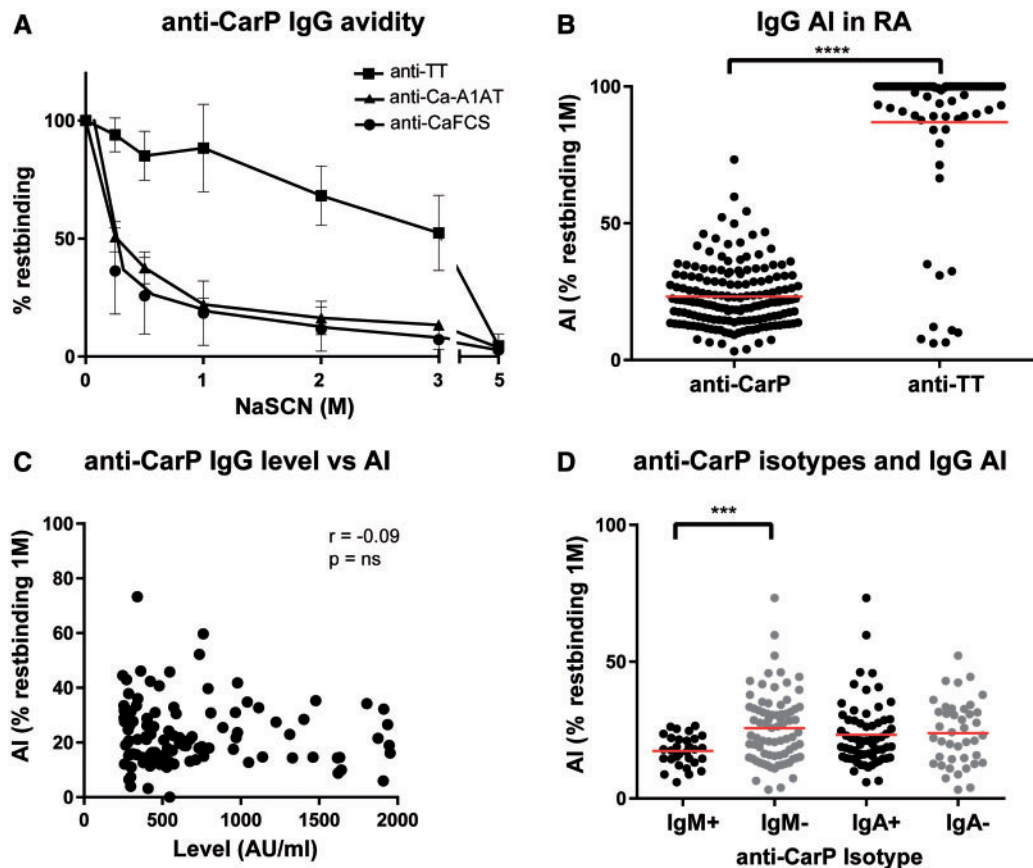

Elution ELISA assays were performed to test the anti-CarP antibody IgG avidity on Ca-FCS and Ca-A1AT and TT IgG avidity in sera of four RA patients. The percentage restbinding at various molarities of NaSCN is depicted (A). Anti-CarP and recall IgG avidity was tested in RA patients ( $n = 107$ ) using Ca-FCS as antigen for anti-CarP IgG and TT as recall antigen (B). The anti-CarP antibody IgG avidity does not correlate with anti-CarP antibody IgG levels (AU/ml) (C). The anti-CarP IgG avidity was investigated between anti-CarP IgM or IgA-positive and -negative patients. The anti-CarP antibody IgG avidity is lower in anti-CarP antibody IgM-positive patients (IgM<sup>+</sup>  $n = 30$ , IgM<sup>-</sup>  $n = 77$ , IgA<sup>+</sup>  $n = 65$ , IgA<sup>-</sup>  $n = 41$ ) (D). The AI is depicted as percent restbinding at 1 M NaSCN (B–D). Mann-Whitney test (B and D) \* $P = 0.05$ – $0.002$ , \*\* $P = 0.002$ – $0.0002$ , \*\*\* $P = 0.0002$ – $0.0001$ , \*\*\*\* $P < 0.0001$ , Spearman correlation (C). Anti-CarP antibody: anti-carbamylated protein antibody; Ca-FCS: carbamylated fetal calf serum; Ca-A1AT: carbamylated alpha-1-antitrypsin; TT: tetanus toxoid; NaSCN: sodium thiocyanate; AU/ml: arbitrary units per millilitre; AI: avidity index.

an anti-CarP antibody IgM-positive and -negative group. RA patients positive for anti-CarP IgM showed a slight but significantly lower anti-CarP IgG avidity (median AI 17.7%) compared with the anti-CarP IgM-negative patients (median AI 24.2%) (Fig. 1D). This effect was not found between anti-CarP antibody IgA-positive or -negative patients, indicating that it is specific for IgM. Furthermore, there was no difference in disease duration between the anti-CarP antibody IgM-positive (median 24.1 weeks) and -negative patients (median 23.4 weeks), indicating that this is not a reflection of a shorter disease process.

Importantly, the anti-CarP IgG avidity is similar in IgM depleted or non-depleted serum, suggesting that the presence of IgM is not interfering with the IgG affinity

measurement (supplementary Fig. S1 available at *Rheumatology* online).

Overall, these data indicate that a less differentiated antibody response, still including IgM, associates with lower anti-CarP IgG avidity.

#### Anti-CarP IgG avidity is lower than the avidity of ACPA

Previous data from our group indicates that also the ACPA IgG avidity is low in RA patients [26]. To determine whether the anti-CarP antibody and ACPA IgG avidity is similar, an initial group of four patients double-positive for ACPA and anti-CarP antibodies was tested for the avidity of the anti-CarP, ACPA and anti-TT IgG response using



**Fig. 2** The anti-CarP avidity is lower than the ACPA avidity and is similar in ACPA positive/negative RA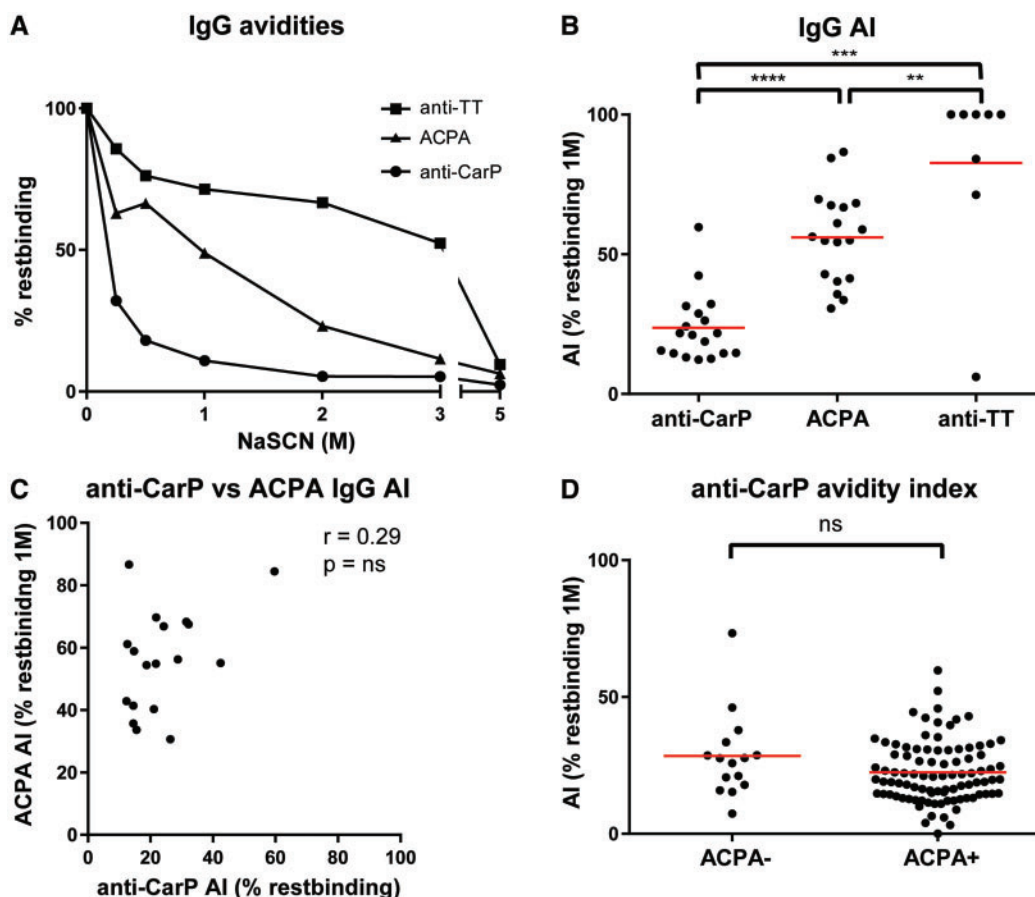

An initial group of four RA patients was tested in titration for the anti-CarP antibody, ACPA and anti-TT IgG avidity. One representative patient is shown (A). Anti-CarP antibody, ACPA and anti-TT IgG avidity in 18 double-positive RA patients (B). The anti-CarP antibody and ACPA IgG avidity do not correlate (C) and there is no difference in anti-CarP antibody IgG avidity between patients positive or negative for ACPA ( $n = 107$ ) (D). The AI is depicted as percent restbinding at 1 M NaSCN. Mann-Whitney test (B and D)  $*P = 0.05-0.002$ ,  $**P = 0.002-0.0002$ ,  $***P = 0.0002-0.0001$ ,  $****P < 0.0001$ , Spearman correlation (C). Anti-CarP antibody: anti-carbamylated protein antibody; TT: tetanus toxoid; AI: avidity index.

several concentrations of chaotropic salt in the elution assay. We observed that in almost all patients analysed the avidity of anti-CarP antibodies was lower as compared with ACPA and anti-TT. Data of one representative patient is depicted in Fig. 2A. Next, an additional 18 patients, double-positive for anti-CarP and ACPA IgG, were analysed for the anti-CarP, ACPA and anti-TT IgG avidity using 1 M NaSCN. The results of these analyses show that both anti-CarP antibody and ACPA IgG are of low avidity compared with the avidity of anti-TT IgG ( $P < 0.001$  for anti-CarP and  $P = 0.0014$  for ACPA) (Fig. 2B). However, interestingly, the anti-CarP IgG avidity was even lower than the ACPA IgG avidity. Moreover, no obvious correlation is found between the avidity of anti-CarP IgG and ACPA IgG (Fig. 2C) and we could not detect a difference in anti-CarP IgG avidity between patients positive or negative for ACPA ( $n = 107$ ) (Fig. 2D).

To summarize, the avidity of anti-CarP is lower compared with ACPA and antibody avidities are not associated with each other.

#### Anti-CarP avidity is slightly higher in serum compared with SF

To study whether anti-CarP antibodies present in the SF of inflamed joints may have a different avidity than the anti-CarP antibodies in the circulation, we compared the anti-CarP IgG avidity in SF to the avidity of anti-CarP in paired sera that were collected at the same time point as the SF. These analyses revealed a slightly, but consistently, lower anti-CarP IgG avidity in SF (Fig. 3A), with the anti-CarP IgG avidity in SF correlating to the anti-CarP IgG avidity in sera (correlation coefficient 0.6089,  $P < 0.001$ ) (Fig. 3B). Blocking experiments were performed to investigate whether the difference in avidity

**Fig. 3** Anti-CarP IgG avidity is slightly lower in SF compared with serum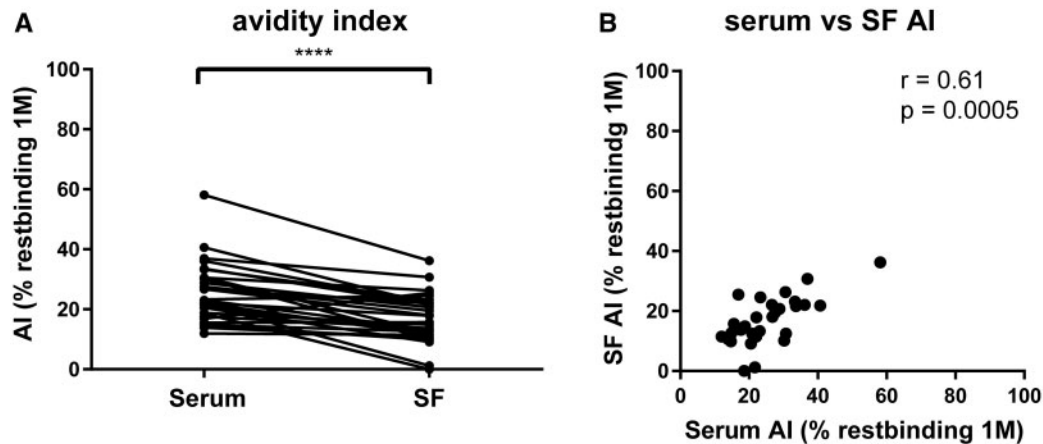

To investigate whether the anti-CarP antibody IgG avidity differs between serum and SF, SF and paired sera samples of 29 RA patients were tested (A). The anti-CarP antibody IgG avidity in SF correlates the avidity in serum (B). The AI is depicted as percent restbinding at 1 M NaSCN. Wilcoxon signed ranks test (A) \* $P = 0.05-0.002$ , \*\* $P = 0.002-0.0002$ , \*\*\* $P = 0.0002-0.0001$ , \*\*\*\* $P < 0.0001$ , Spearman correlation (B). Anti-CarP antibody: anti-carbamylated protein antibody; AI: avidity index.

could be explained by the presence of carbamylated antigens, to which the high avidity anti-CarP IgG might have bound. Paired serum was pre-incubated with or without Ca-FCS or FCS and the avidity was analysed. However, no difference in avidity was observed between the different conditions (data not shown).

#### No evidence for anti-CarP avidity maturation before disease onset

RA-associated autoantibodies, including anti-CarP antibodies, can be detected many years prior to disease onset [9, 16] and for ACPA we have shown previously that there is (limited) avidity maturation taking place during this 'pre-RA' period [29]. As we observed that RA patients display a certain range of low to moderately high anti-CarP IgG avidity at baseline, this might indicate that a certain degree of avidity maturation has occurred in a proportion of the anti-CarP antibody IgG-positive patients. Therefore, we next wished to study the avidity maturation in longitudinal samples of early RA patients collected before and after the symptom onset [9, 33]. The samples were available over a period of 15 years. Overall, we observed no anti-CarP IgG avidity increase during the period before symptom onset (Fig. 4).

#### Anti-CarP IgG avidity is not associated with more severe joint destruction

Previous data of our group showed that the presence of anti-CarP IgG at baseline associates with a more severe joint destruction over time [6]. Furthermore, we have shown that low avidity ACPA IgG at baseline associates with more radiological damage over time [30]. Next to these findings in RA, it has also been shown that antibody

**Fig. 4** No evidence for anti-CarP avidity maturation before symptom onset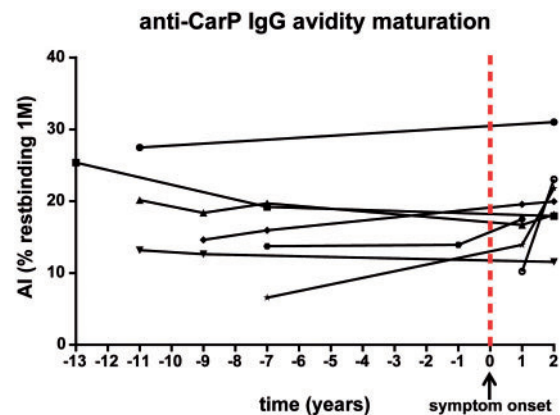

To investigate the anti-CarP antibody IgG avidity maturation, eight anti-CarP antibody IgG-positive RA patients, sampled before and after symptom onset, were analysed. No anti-CarP antibody IgG avidity was detected before symptom onset. The AI is depicted as percent restbinding at 1 M NaSCN. Anti-CarP antibody: anti-carbamylated protein antibody; AI: avidity index.

avidity associates with different clinical outcomes in other autoimmune diseases [41–43]. Therefore, we investigated whether the high or low anti-CarP IgG avidity associates with more severe joint destruction over time. However, when we compared the joint destruction and anti-CarP avidity, we observed no difference in severity at baseline or over time between the different anti-CarP avidity quartiles (Fig. 5).

**Fig. 5** Anti-CarP avidity is not associated with more radiological damage

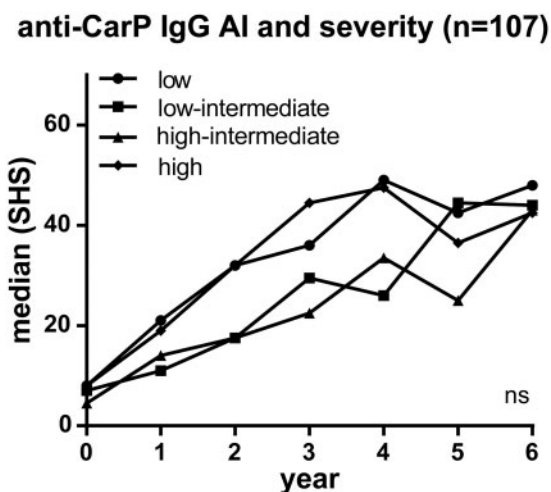

The extent and rate of joint destruction were analysed in all RA patients. RA patients were subdivided in anti-CarP IgG avidity quartiles with equal numbers of patients in each quartile. The severity of joint damage is depicted as median SHS on the y-axis and the follow-up years on the x-axis. SHS: Sharp-van der Heijde score; anti-CarP antibody: anti-carbamylated protein antibody.

## Discussion

In this study we observed that the anti-CarP IgG avidity is low, in both serum and SF, compared with the avidity of the recall antibody against TT. Furthermore, the anti-CarP IgG avidity seems to be even lower than the ACPA IgG avidity and no anti-CarP avidity maturation has been observed. These data indicate that the regulation of the anti-CarP immune response is different from the regulation of recall responses and the ACPA response.

Although substantial information is available on the avidity (maturation) of antibody responses against recall antigens [24], less information is present on avidity (maturation) of autoantibody responses. It is known that autoantibodies have different avidities (high, moderate or low) in autoimmune diseases and different autoantibody avidities associate with a more or less severe disease course (reviewed in [24]). In a few studies, the autoantibody avidity is compared with the avidity of recall antibodies [25, 26] and these studies revealed a low avidity of autoantibodies compared with recall antibodies. We also found in this study a low avidity for anti-CarP antibodies compared with antibodies against TT. This suggests that autoantibodies are overall of low avidity compared with recall antibodies and within this avidity range the avidity of autoantibodies associates with various clinical outcomes. Importantly, a low avidity of autoantibodies does not indicate that these antibodies are not relevant, as we know that the presence of both ACPA and anti-CarP is associated with, for example, disease development [17] and

with severity of the disease [6, 9, 10, 12, 18]. It does, however, imply that the mechanisms driving the production of protective vaccine antigens is very different from the mechanisms that lead to the production of autoantibodies. Interesting in this study is the lower anti-CarP IgG avidity in patients positive for anti-CarP antibody IgM. This cannot easily be explained by competing influences for binding of anti-CarP IgM with IgG, as in IgM-depleted serum the anti-CarP IgG avidity is similar to total serum. This suggests limited competition for binding between anti-CarP IgM and IgG. In addition, in the context of ACPA avidity, we have previously compared whether the ACPA IgG avidity as measured in serum would be different from that of purified IgG. In ACPA IgG and IgM double-positive patients we observed no differences in ACPA IgG avidity in total serum or purified IgG [26]. This indicates that the presence of IgM does not impact on the measured IgG avidity. As a possible explanation for the concomitant presence of anti-CarP IgM with low avidity anti-CarP IgG we consider it conceivable that these patients display a less mature response, as anti-CarP IgG single-positive or anti-CarP IgG and IgA double-positive patients have overall higher anti-CarP IgG avidities (data not shown). Importantly, there is no difference in symptom duration between anti-CarP IgM-positive and -negative patients from the Early Arthritis Clinic, indicating that anti-CarP IgG avidity is not related to time but rather to maturation of the anti-CarP response. Whether patients with a less mature response at baseline will undergo this maturation later during the disease progression is unknown.

Furthermore, we found that in baseline serum samples of ACPA and anti-CarP IgG double-positive patients, the ACPA IgG avidity is higher than the anti-CarP IgG avidity. This might suggest that the ACPA response is differently regulated than the anti-CarP response.

Moreover, despite isotype switching before disease onset [19], no evidence for anti-CarP IgG avidity maturation was observed before symptom onset; however, some patients might have a minimal avidity increase after symptom onset. Altogether, these data suggest that the isotype switch and avidity maturation in the anti-CarP B cell response are uncoupled. This uncoupling could be explained by various non-excluding mechanisms. For example, it might be due to a difference in additional stimulation of the B cells, such as the degree of innate or T cell help (reviewed in [44]) and/or the abundance of its antigen. It could be that low avidity antibodies are a marker for chronic antigen overload and chronic antibody responses. Another option could be that anti-CarP antibodies and ACPA cross-react with another antigen, which is currently unknown, to which the antibodies might have a more normal response.

In this study we also investigated whether the anti-CarP antibody avidity associates with joint damage over time. The presence of anti-CarP antibodies, especially in the ACPA-negative stratum, is associated with a more severe disease course [6, 19]. When investigating anti-CarP avidity, we did not observe an association

with joint damage. This is different from our previous observations regarding ACPA where low avidity ACPA associates with more radiological damage at baseline and over time [30]. Furthermore, low avidity ACPA was a better complement activator compared with high avidity ACPA [30]. Therefore, ACPA avidity might be of clinical relevance for the determination of RA patients at risk for a more severe disease course. Moreover, low avidity antibodies might be better in tissue penetration, as shown for anti-tumour antibodies [31], and possibly resulting in immune activation at a deeper location. For ACPA we observed that especially the patients with very low avidity ACPA presented with severe radiological damage [30]. Also, anti-CarP antibodies are associated with radiological damage [6] and since the avidity of the anti-CarP response is as low as the lowest avidities for ACPA it is conceivable that this explains why, for anti-CarP, we do not observe an association between the avidity and severity of joint destruction.

To conclude, the anti-CarP IgG avidity is low compared with the avidity against the recall antigen TT and points to a different regulation of anti-CarP antibody responses as compared with anti-TT responses. This is also indicated by the uncoupling of avidity maturation despite extensive isotype switching.

## Acknowledgements

We thank E.W.N. Levarht for her advice and technical assistance and help with the collection of the materials.

M.A.M.vD. set up the study design and performed the experiments, as well as the analysis, interpretation of the data, drafting the article and approval of the final manuscript. M.K.V. contributed to study design and experiments, interpretation of the data, revising the manuscript and approval of the final manuscript. L.E.B. and A.H.M.vd.H.vM contributed to the analysis, interpretation of the data, revising the manuscript and approval of the final manuscript. S.R.-D., R.E.M.T. and T.W.J.H. contributed to the interpretation of the data, revising the manuscript and approval of the final manuscript. L.A.T. contributed to study design, interpretation of the data, revising the manuscript and approval of the final manuscript.

**Funding:** This work was supported by the Dutch Arthritis Foundation (14-2-402) and the Innovative Medicines Initiatives Joint Undertaking funded project BeTheCure (115142-2). A.H.M.vd.H.vM. is supported by a ZON-MW Vidi grant, R.E.M.T. by a ZON-MW Vici grant and L.A.T. by a ZON-MW Vidi grant (91712334).

**Disclosure statement:** T.W.J.H., R.E.M.T. and L.A.T. are listed as inventors in a patent application regarding the detection of anti-CarP antibodies for RA. The other authors have declared no conflict of interest.

## Supplementary data

Supplementary data are available at *Rheumatology* online.

## References

- 1 Scott DL, Wolfe F, Huizinga TW. Rheumatoid arthritis. *Lancet* 2010;376:1094–108.
- 2 Aletaha D, Neogi T, Silman AJ *et al.* 2010 rheumatoid arthritis classification criteria: an American College of Rheumatology/European League Against Rheumatism collaborative initiative. *Ann Rheum Dis* 2010;69:1580–8.
- 3 Trouw LA, Rispens T, Toes REM. Beyond citrullination: other post-translational protein modifications in rheumatoid arthritis. *Nat Rev Rheumatol* 2017;13:331–9.
- 4 Daha NA, Banda NK, Roos A *et al.* Complement activation by (auto-) antibodies. *Mol Immunol* 2011;48:1656–65.
- 5 Trouw LA, Haisma EM, Levarht EW *et al.* Anti-cyclic citrullinated peptide antibodies from rheumatoid arthritis patients activate complement via both the classical and alternative pathways. *Arthritis Rheum* 2009;60:1923–31.
- 6 Shi J, Knevel R, Suwannalai P *et al.* Autoantibodies recognizing carbamylated proteins are present in sera of patients with rheumatoid arthritis and predict joint damage. *Proc Natl Acad Sci USA* 2011;108:17372–7.
- 7 Trouw LA, Mahler M. Closing the serological gap: promising novel biomarkers for the early diagnosis of rheumatoid arthritis. *Autoimmun Rev* 2012;12:318–22.
- 8 Shi J, van Veelen PA, Mahler M *et al.* Carbamylation and antibodies against carbamylated proteins in autoimmunity and other pathologies. *Autoimmun Rev* 2014;13:225–30.
- 9 Brink M, Verheul MK, Ronnelid J *et al.* Anti-carbamylated protein antibodies in the pre-symptomatic phase of rheumatoid arthritis, their relationship with multiple anti-citrulline peptide antibodies and association with radiological damage. *Arthritis Res Ther* 2015;17:25.
- 10 Yee A, Webb T, Seaman A *et al.* Anti-CarP antibodies as promising marker to measure joint damage and disease activity in patients with rheumatoid arthritis. *Immunol Res* 2015;61:24–30.
- 11 Verheul MK, Shiozawa K, Levarht EW *et al.* Anti-carbamylated protein antibodies in rheumatoid arthritis patients of Asian descent. *Rheumatology (Oxford)* 2015;54:1930–2.
- 12 Montes A, Regueiro C, Perez-Pampin E *et al.* Anti-carbamylated protein antibodies as a reproducible independent type of rheumatoid arthritis autoantibodies. *PLoS One* 2016;11:e0161141.
- 13 Challener GJ, Jones JD, Pelzek AJ *et al.* Anti-carbamylated protein antibody levels correlate with anti-Sa (citrullinated vimentin) antibody levels in rheumatoid arthritis. *J Rheumatol* 2016;43:273–81.
- 14 Bell DA, Elhayek S, Cairns E, Barra L. Anti-homocitrullinated protein antibody isotype usage in rheumatoid arthritis and their unaffected first-degree relatives. *Clin Exp Rheumatol* 2017;35:948–53.
- 15 Shi J, van de Stadt LA, Levarht EW *et al.* Anti-carbamylated protein (anti-CarP) antibodies precede the onset of rheumatoid arthritis. *Ann Rheum Dis* 2014;73:780–3.
- 16 Gan RW, Trouw LA, Shi J *et al.* Anti-carbamylated protein antibodies are present prior to rheumatoid arthritis and are associated with its future diagnosis. *J Rheumatol* 2015;42:572–9.
- 17 Shi J, van de Stadt LA, Levarht EW *et al.* Anti-carbamylated protein antibodies are present in arthralgia patients



- and predict the development of rheumatoid arthritis. *Arthritis Rheum* 2013;65:911–5.
- 18 Ajeganova S, van Steenberg HW, Verheul MK *et al*. The association between anti-carbamylated protein (anti-CarP) antibodies and radiographic progression in early rheumatoid arthritis: a study exploring replication and the added value to ACPA and rheumatoid factor. *Ann Rheum Dis* 2016;76:112–8.
  - 19 van Delft MAM, Verheul MK, Burgers LE *et al*. The isotype and IgG subclass distribution of anti-carbamylated protein antibodies in rheumatoid arthritis patients. *Arthritis Res Therapy* 2017;19:190.
  - 20 Parham P. The body's defence against infection. In: Parham P, ed. *The immune system*. New York and Abingdon: Garland Science, 2009: 303–8.
  - 21 Aboud S, Matre R, Lyamuya EF, Kristoffersen EK. Levels and avidity of antibodies to tetanus toxoid in children aged 1–15 years in Dar es Salaam and Bagamoyo, Tanzania. *Ann Trop Paediatr* 2000;20:313–22.
  - 22 Usinger WR, Lucas AH. Avidity as a determinant of the protective efficacy of human antibodies to pneumococcal capsular polysaccharides. *Infection Immun* 1999;67:2366–70.
  - 23 Breukels MA, Jol-van der Zijde E, van Tol MJ, Rijkers GT. Concentration and avidity of anti-Haemophilus influenzae type b (Hib) antibodies in serum samples obtained from patients for whom Hib vaccination failed. *Clin Infect Dis* 2002;34:191–7.
  - 24 Fialova L. Avidity of selected autoantibodies - usefulness of their determination for clinical purposes. *Epidemiol Mikrobiol Imunol* 2016;65:155–63.
  - 25 Gelderman KA, Drop AC, Trouw LA *et al*. Serum autoantibodies directed against transglutaminase-2 have a low avidity compared with alloantibodies against gliadin in coeliac disease. *Clin Exp Immunol* 2014;177:86–93.
  - 26 Suwannalai P, Scherer HU, van der Woude D *et al*. Anti-citrullinated protein antibodies have a low avidity compared with antibodies against recall antigens. *Ann Rheum Dis* 2011;70:373–9.
  - 27 Nielen MM, van Schaardenburg D, Reesink HW *et al*. Specific autoantibodies precede the symptoms of rheumatoid arthritis: a study of serial measurements in blood donors. *Arthritis Rheum* 2004;50:380–6.
  - 28 Rantapää-Dahlqvist S, de Jong BA, Berglin E *et al*. Antibodies against cyclic citrullinated peptide and IgA rheumatoid factor predict the development of rheumatoid arthritis. *Arthritis Rheum* 2003;48:2741–9.
  - 29 Suwannalai P, van de Stadt LA, Radner H *et al*. Avidity maturation of anti-citrullinated protein antibodies in rheumatoid arthritis. *Arthritis Rheum* 2012;64:1323–8.
  - 30 Suwannalai P, Britsemmer K, Knevel R *et al*. Low-avidity anticitrullinated protein antibodies (ACPA) are associated with a higher rate of joint destruction in rheumatoid arthritis. *Ann Rheum Dis* 2014;73:270–6.
  - 31 Adams GP, Schier R, McCall AM *et al*. High affinity restricts the localization and tumor penetration of single-chain fv antibody molecules. *Cancer Res* 2001;61:4750–5.
  - 32 de Rooy DP, van der Linden MP, Knevel R, Huizinga TW, van der Helm-van Mil AH. Predicting arthritis outcomes—what can be learned from the Leiden Early Arthritis Clinic? *Rheumatology (Oxford)* 2011;50:93–100.
  - 33 Brink M, Hansson M, Mathsson L *et al*. Multiplex analyses of antibodies against citrullinated peptides in individuals prior to development of rheumatoid arthritis. *Arthritis Rheum* 2013;65:899–910.
  - 34 van der Woude D, Syversen SW, van der Voort EI *et al*. The ACPA isotype profile reflects long-term radiographic progression in rheumatoid arthritis. *Ann Rheum Dis* 2010;69:1110–6.
  - 35 Kroon FP, van Tol MJ, Jol-van der Zijde CM, van Furth R, van Dissel JT. Immunoglobulin G (IgG) subclass distribution and IgG1 avidity of antibodies in human immunodeficiency virus-infected individuals after revaccination with tetanus toxoid. *Clin Diagn Lab Immunol* 1999;6:352–5.
  - 36 Verheul MK, Yee A, Seaman A *et al*. Identification of carbamylated alpha 1 anti-trypsin (A1AT) as an antigenic target of anti-CarP antibodies in patients with rheumatoid arthritis. *J Autoimmun* 2017;80:77–84.
  - 37 Chapuy-Regaud S, Nogueira L, Clavel C *et al*. IgG subclass distribution of the rheumatoid arthritis-specific autoantibodies to citrullinated fibrin. *Clin Exp Immunol* 2005;139:542–50.
  - 38 Perciani CT, Peixoto PS, Dias WO, Kubrusly FS, Tanizaki MM. Improved method to calculate the antibody avidity index. *J Clin Lab Anal* 2007;21:201–6.
  - 39 van der Heijde D. How to read radiographs according to the Sharp/van der Heijde method. *J Rheumatol* 2000;27:261–3.
  - 40 Knevel R, Tsonaka R, le Cessie S *et al*. Comparison of methodologies for analysing the progression of joint destruction in rheumatoid arthritis. *Scand J Rheumatol* 2013;42:182–9.
  - 41 Cucnik S, Kveder T, Krizaj I, Rozman B, Bozic B. High avidity anti-beta 2-glycoprotein I antibodies in patients with antiphospholipid syndrome. *Ann Rheum Dis* 2004;63:1478–82.
  - 42 Villalta D, Romelli PB, Savina C *et al*. Anti-dsDNA antibody avidity determination by a simple reliable ELISA method for SLE diagnosis and monitoring. *Lupus* 2003;12:31–6.
  - 43 Zhang Y, Gao Y, Li M *et al*. Avidity of thyroglobulin antibody in sera from patients with Hashimoto's thyroiditis with different thyroid functional status. *Clin Exp Immunol* 2010;161:65–70.
  - 44 Vinuesa CG, Chang PP. Innate B cell helpers reveal novel types of antibody responses. *Nat Immunol* 2013; 14:119–26.
